# Supplementary material for: Aggregation-induced photodimerization of an alkynylpyrene derivative as a photoresponsive fluorescent ink
Source: Royal Society of Chemistry journal article supplement (doi:10.1039/c9tc03786a), 2019-01-01
Supplement: c9tc03786a1.pdf [file c9tc03786a1.pdf]

Supporting Information

**Aggregation-induced photodimerization of an alkynylpyrene derivative as a photoresponsive fluorescent ink**

Junying Zhang,<sup>a</sup> Shao-Xiong Tang,<sup>a</sup> Rong Fu,<sup>a</sup> Xing-Dong Xu<sup>\*a</sup> and Shengyu Feng<sup>a</sup>

a. National Engineering Research Center for Colloidal Materials, Key Laboratory of Special Functional Aggregated Materials of Ministry of Education, Shandong University, Jinan 250100, Shandong, China. E-mail: xuxd@sdu.edu.cn

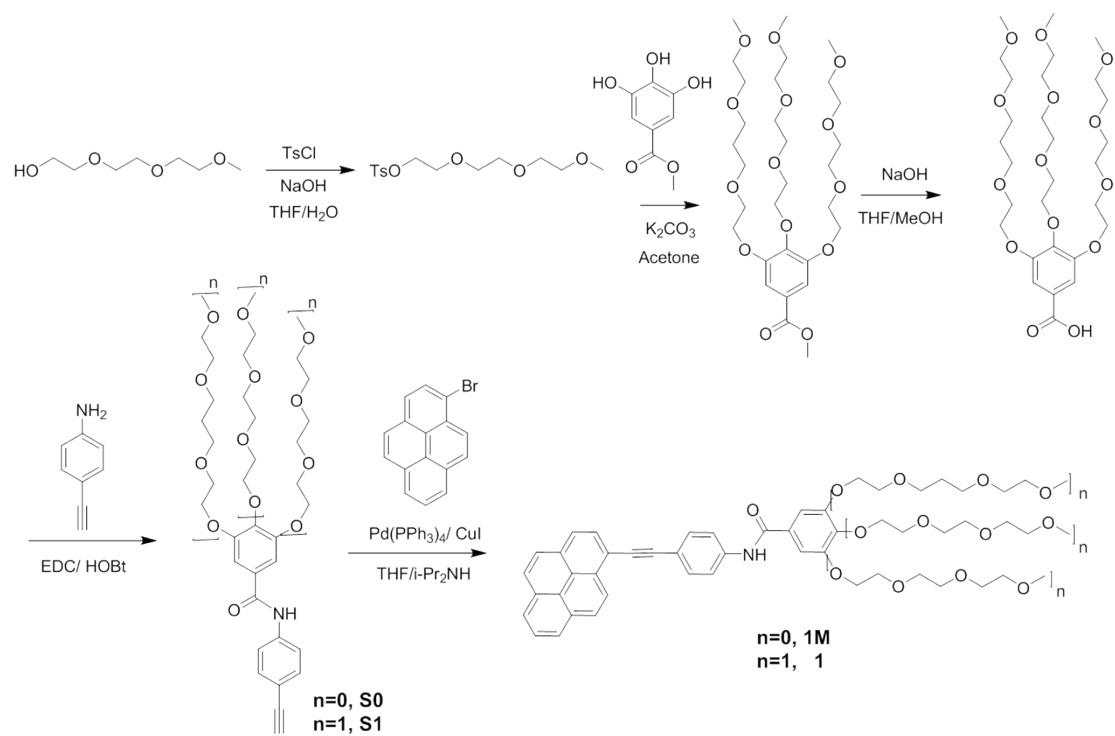

**Scheme S1.** Synthesis route of compound **1**.

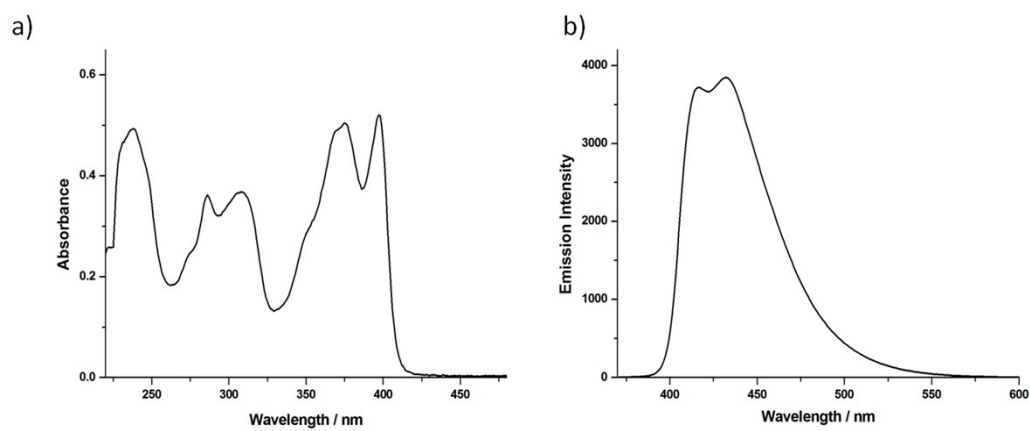

**Fig. S1** a) UV/Vis spectra and b) emission spectra of compound **1** in dilute dichloromethane solution ( $1.0 \times 10^{-5}$  M).

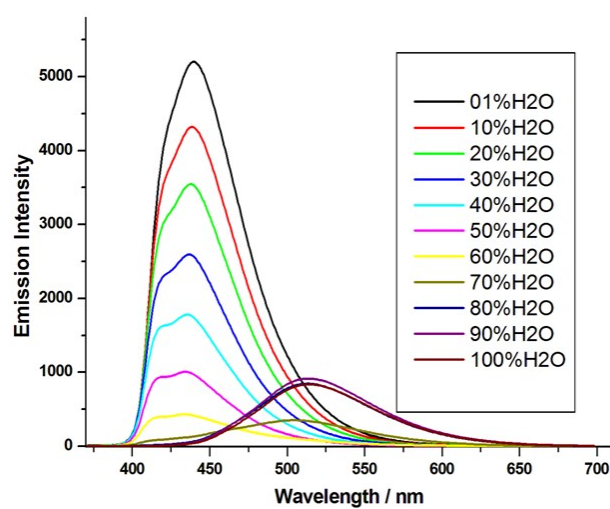

**Fig. S2** Fluorescence emission spectra of **1** in DMSO/H<sub>2</sub>O mixtures with different DMSO fractions at a fixed concentration ( $1.0 \times 10^{-5}$  M,  $\lambda_{\text{ex}}=340$  nm)

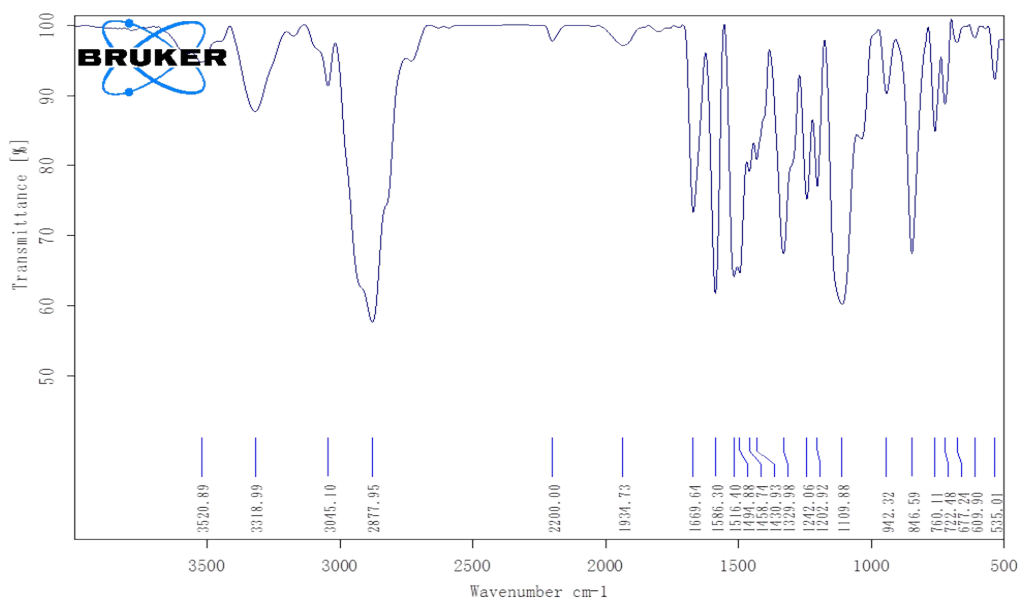

**Fig. S3** FT-IR spectra of compound **1**.

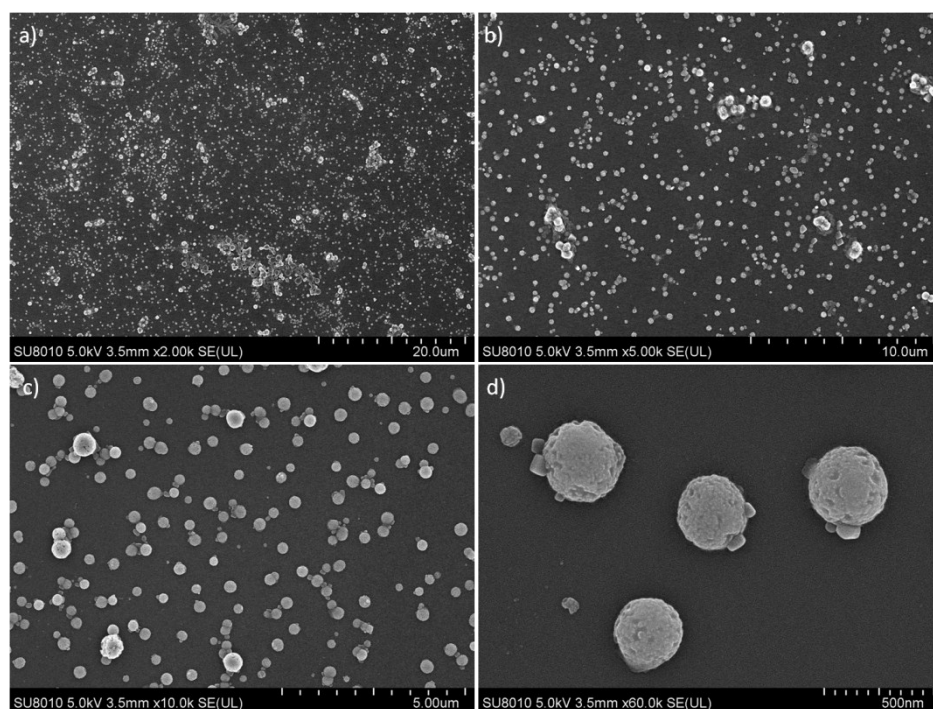

**Fig. S4** Selected SEM image of **1** prepared in DMSO/H<sub>2</sub>O mixture (v:v 1:99).

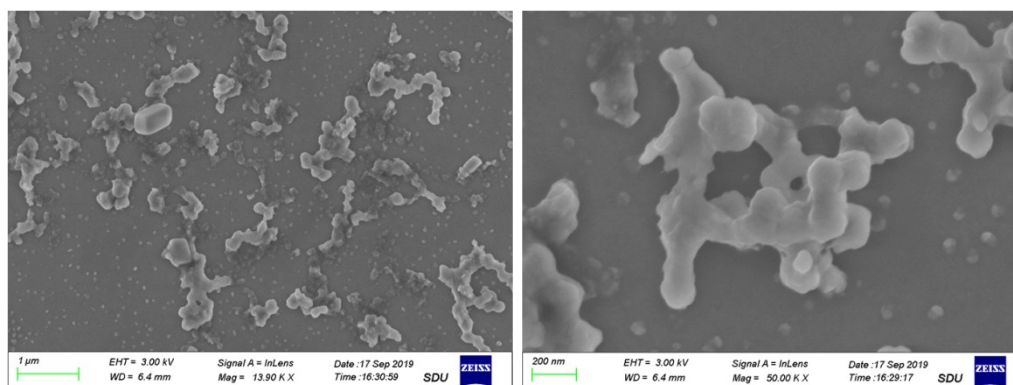

**Fig. S5** SEM images of **1** after 400 nm LED irradiation for 30 min.

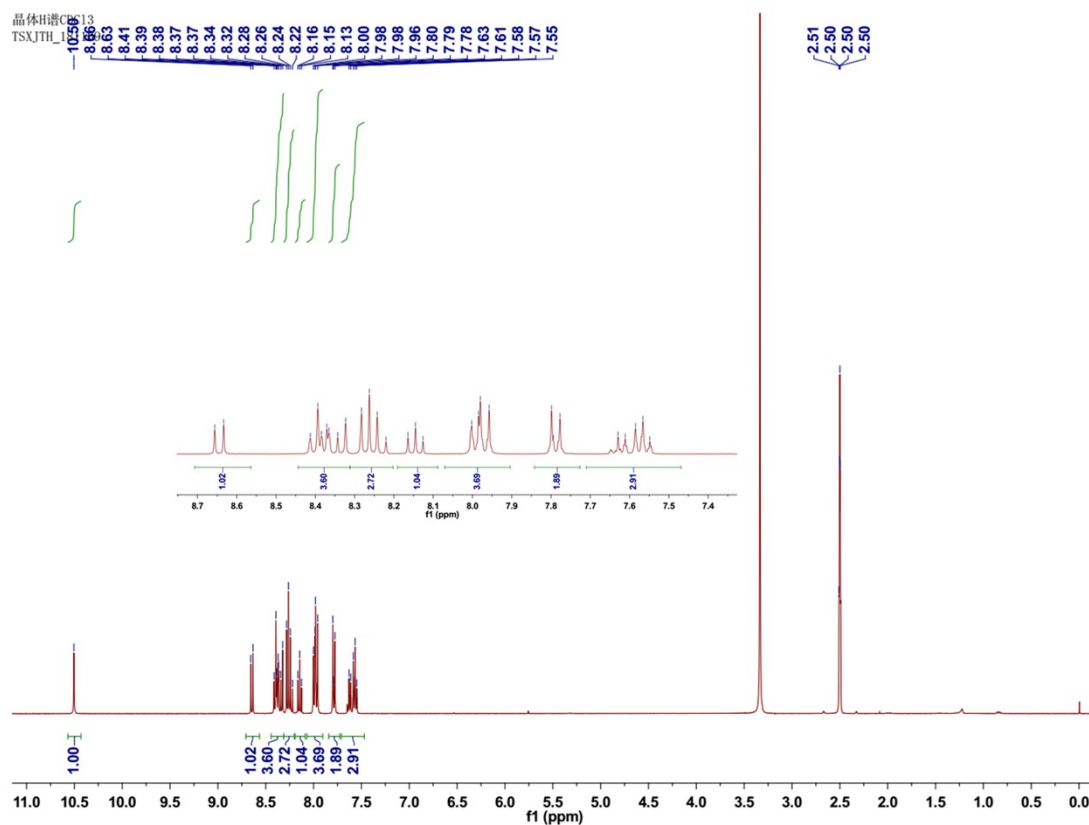

**Fig. S6**  $^1\text{H}$  NMR spectrum of compound **1M** in DMSO- $d_6$  (400 MHz) at 298 K.

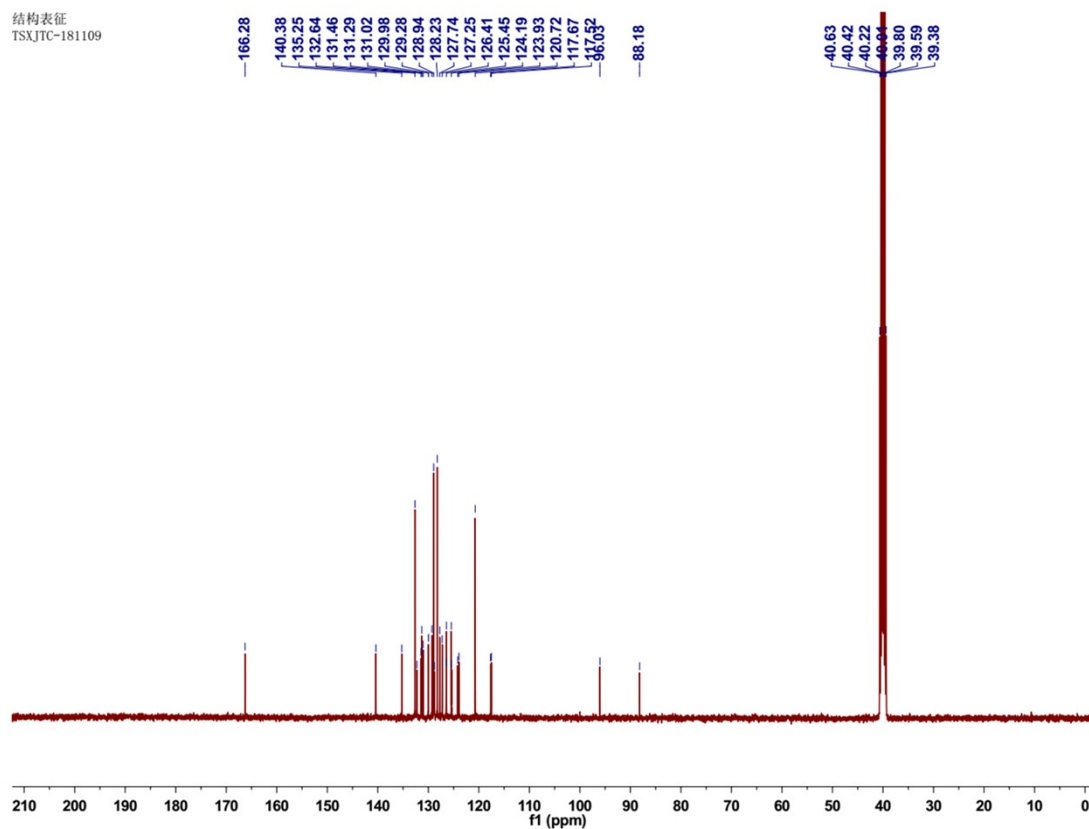

**Fig. S7**  $^{13}\text{C}$  NMR spectrum of compound **1M** in DMSO- $d_6$  (100 MHz) at 298 K.

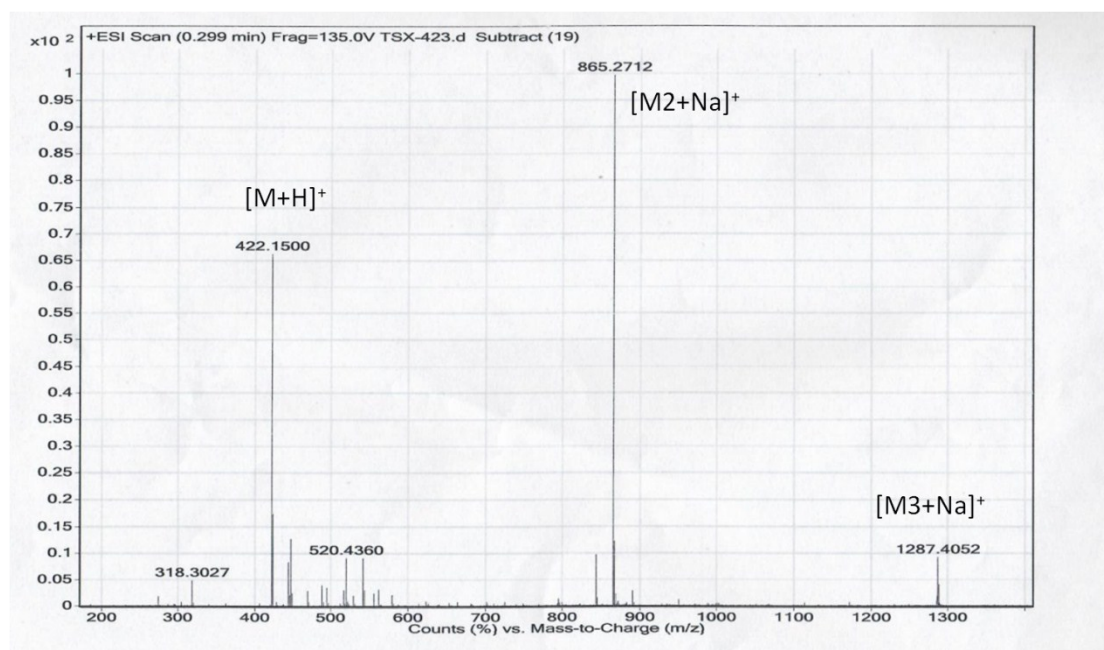

**Fig. S8** HR-ESI-MS spectra of compound **1M**.

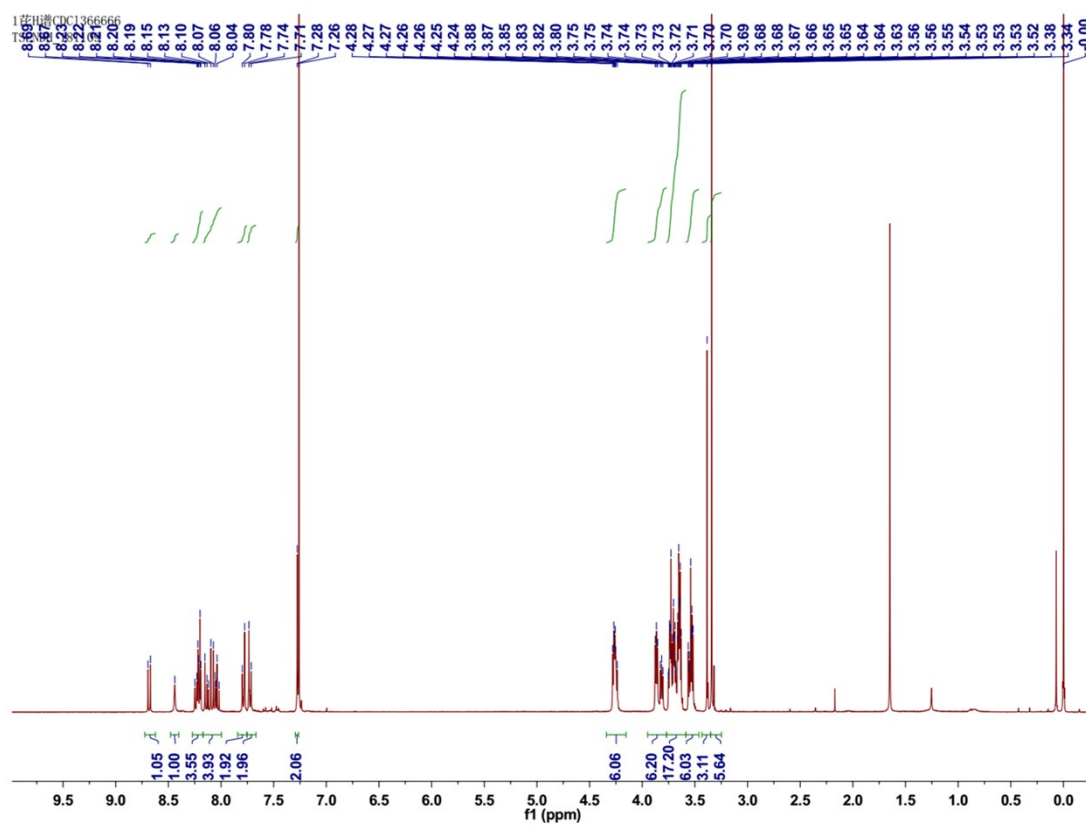

**Fig. S9**  $^1\text{H}$  NMR spectrum of compound **1** in  $\text{CDCl}_3$  (400 MHz) at 298 K.

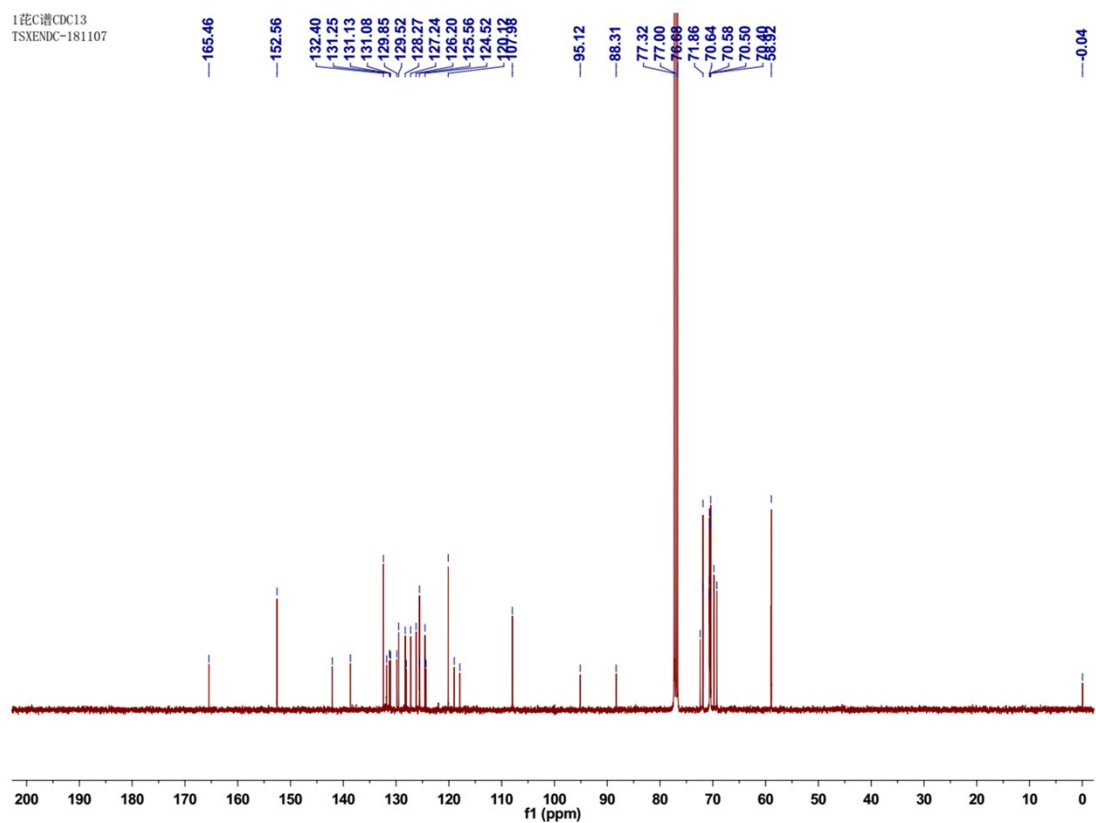

**Fig. S10**  $^{13}\text{C}$  NMR spectrum of compound **1** in  $\text{CDCl}_3$  (100 MHz) at 298 K.

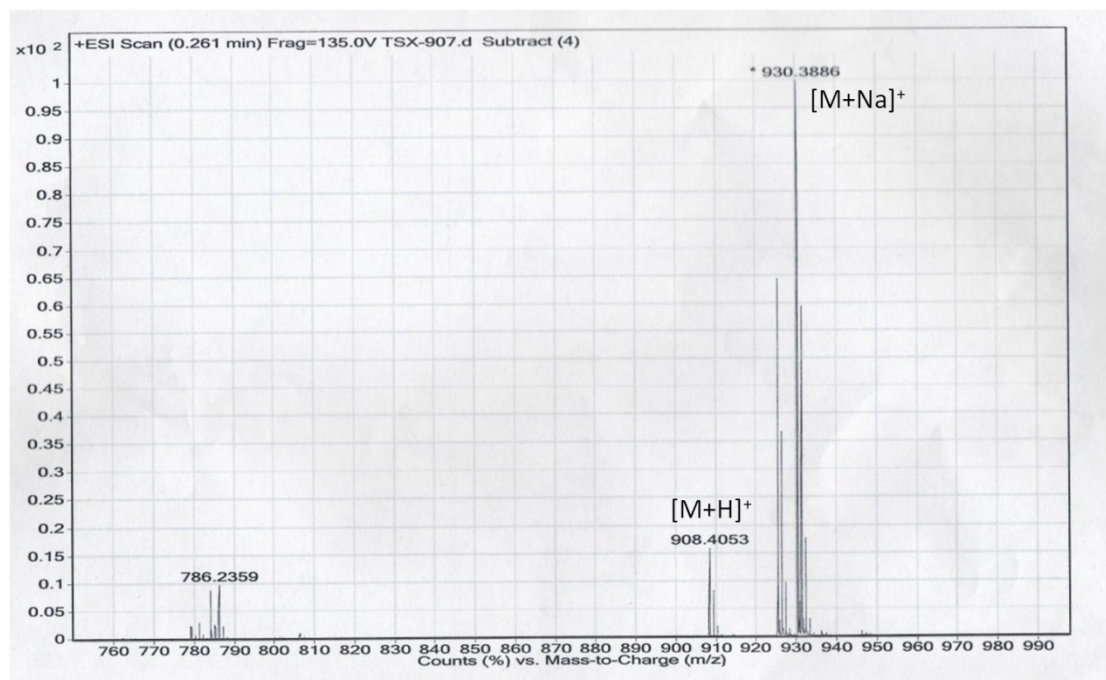

**Fig. S11** MALDI-TOF-MS spectra of compound **1**.
